# Supplementary material for: A series of dinuclear lanthanide complexes with slow magnetic relaxation for Dy2 and Ho2
Source: Royal Society of Chemistry journal article supplement (doi:10.1039/c6dt02962k), 2016-01-01
Supplement: c6dt02962k1.pdf [file c6dt02962k1.pdf]

## Supplementary Information

### A series of dinuclear lanthanide complexes with slow magnetic relaxation for Dy<sub>2</sub> and Ho<sub>2</sub>

Jin Zhang,<sup>a</sup> Haifeng Zhang,<sup>a</sup> Yanmei Chen,<sup>a</sup> Xiangfei Zhang,<sup>b</sup> Yahong Li,<sup>\*a</sup>  
Wei Liu,<sup>\*a</sup> and Yaping Dong<sup>b</sup>

<sup>a</sup> College of Chemistry, Chemical Engineering and Materials Science, Soochow University,  
Suzhou 215123, China. E-mail: liyahong@suda.edu.cn, weiliu@suda.edu.cn

<sup>b</sup> Qinghai Institute of Salt Lakes, Chinese Academy of Sciences, Xining 810008, P. R. China

|                                                                                                    |    |
|----------------------------------------------------------------------------------------------------|----|
| 1. <sup>1</sup> H and <sup>13</sup> C NMR spectra of the H <sub>2</sub> L ligand .....             | 2  |
| 2. Selected bond lengths and angles for <b>1-7</b> .....                                           | 4  |
| 3. XRD patterns of <b>1-7</b> .....                                                                | 8  |
| 4. IR spectra of the H <sub>2</sub> L ligand and <b>1-7</b> .....                                  | 12 |
| 5. Dc magnetic properties of <b>2, 3, 4</b> and <b>6</b> .....                                     | 17 |
| 6. Parameters obtained from fitting the Cole-Cole plots of <b>4</b> .....                          | 18 |
| 7. Plot of ln τ versus T <sup>-1</sup> of <b>4</b> considering the Raman and Orbach processes..... | 19 |
| 8. Ac magnetic properties of <b>4</b> .....                                                        | 20 |
| 9. Ac Magnetic properties of <b>5</b> .....                                                        | 21 |
| 10. Dy <sub>2</sub> SMMs reported in the literature.....                                           | 22 |

1.  $^1\text{H}$  and  $^{13}\text{C}$  NMR spectra of the  $\text{H}_2\text{L}$  ligand

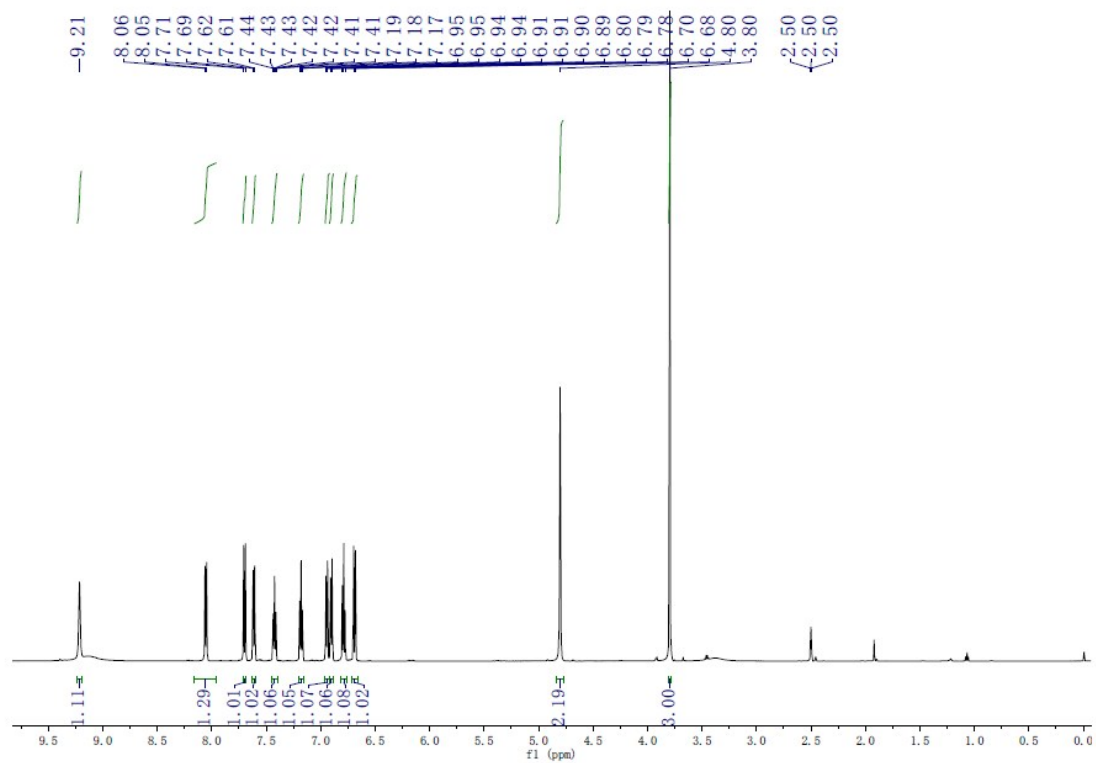

Fig. S1  $^1\text{H}$  NMR (300 MHz) spectrum of  $\text{H}_2\text{L}$  in DMSO.

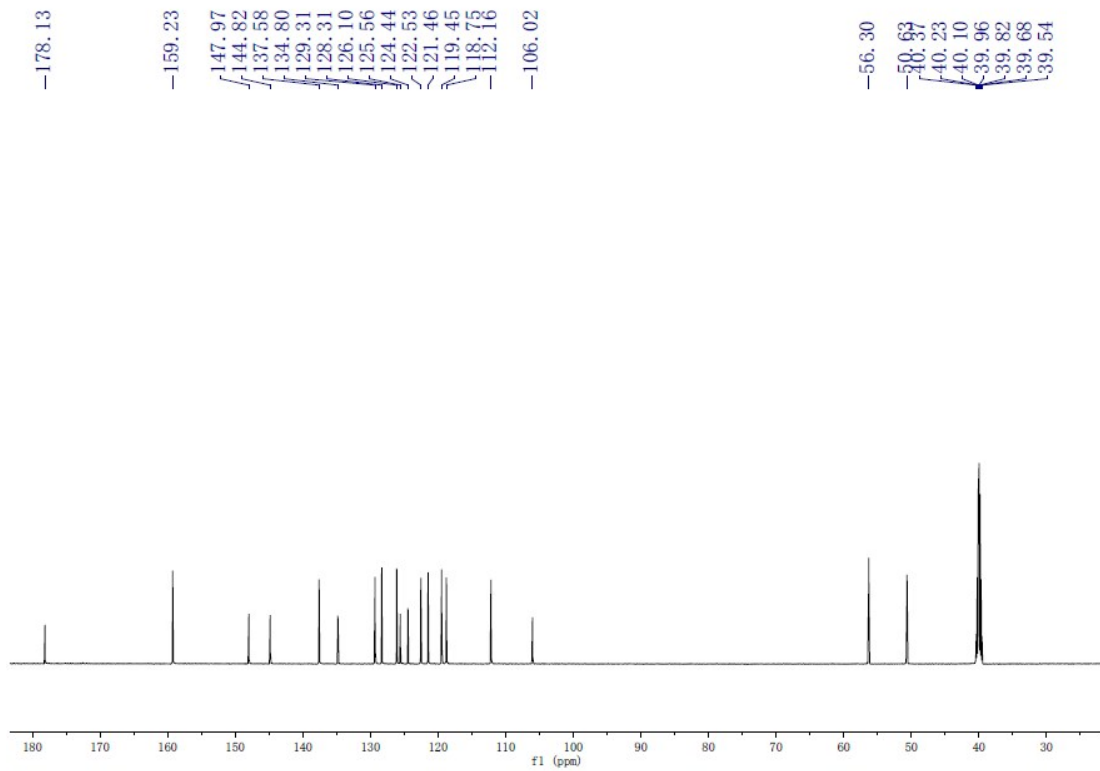

**Fig. S2**  $^{13}\text{C}$  NMR (300 MHz) spectrum of  $\text{H}_2\text{L}$  in DMSO.

## 2. Selected bond lengths and angles for 1-7

**Table S1** Selected Bond distances and bond angles for **1**

| Atom | Atom | Length/Å   | Atom | Atom | Atom | Angle/°    |
|------|------|------------|------|------|------|------------|
| Eu1  | N1   | 2.487(9)   | O7   | Eu1  | N1   | 107.36(19) |
| Eu1  | O1   | 2.219(8)   | O8   | Eu1  | N1   | 76.5(3)    |
| Eu1  | O2   | 2.353(7)   | O1   | Eu1  | N1   | 72.9(3)    |
| Eu1  | O5   | 2.392(7)   | O4   | Eu2  | N2   | 71.6(3)    |
| Eu1  | O6   | 2.534(9)   | O12  | Eu2  | N2   | 108.9(3)   |
| Eu1  | O7   | 2.3786(14) | O5   | Eu2  | N2   | 78.0(3)    |
| Eu1  | O8   | 2.470(7)   | Eu1  | O2   | Eu2  | 109.8(3)   |
| Eu1  | O9   | 2.501(8)   | Eu2  | O5   | Eu1  | 109.1(3)   |
| Eu2  | O2   | 2.361(7)   | O1   | Eu1  | O6   | 81.1(3)    |
| Eu2  | N2   | 2.496(9)   | O1   | Eu1  | O7   | 92.1(3)    |
| Eu2  | O3   | 2.560(7)   | O4   | Eu2  | O3   | 79.2(2)    |
| Eu2  | O4   | 2.201(7)   | O4   | Eu2  | O11  | 82.0(2)    |
| Eu2  | O5   | 2.342(7)   |      |      |      |            |
| Eu2  | O11  | 2.4195(12) |      |      |      |            |
| Eu2  | O12  | 2.486(9)   |      |      |      |            |
| Eu2  | O13  | 2.494(8)   |      |      |      |            |
| Eu1  | Eu2  | 3.8560(13) |      |      |      |            |

**Table S2** Selected Bond distances and bond angles for **2**

| Atom | Atom | Length/Å | Atom | Atom | Atom | Angle/°  |
|------|------|----------|------|------|------|----------|
| Gd1  | N1   | 2.457(7) | N1   | Gd1  | O7   | 97.1(4)  |
| Gd1  | O1   | 2.216(7) | O1   | Gd1  | N1   | 72.4(2)  |
| Gd1  | O2   | 2.331(5) | O8   | Gd1  | N1   | 77.1(2)  |
| Gd1  | O5   | 2.366(6) | Gd1  | O2   | Gd2  | 109.6(2) |
| Gd1  | O6   | 2.520(7) | Gd2  | O5   | Gd1  | 108.9(2) |
| Gd1  | O7   | 2.473(4) | O4   | Gd2  | N2   | 71.9(2)  |
| Gd1  | O8   | 2.442(7) | O5   | Gd2  | N2   | 77.7(2)  |
| Gd1  | O9   | 2.492(7) | O12  | Gd2  | N2   | 109.7(3) |
| Gd2  | O2   | 2.356(6) | O1   | Gd1  | O6   | 80.5(3)  |
| Gd2  | N2   | 2.475(8) | O1   | Gd1  | O7   | 87.7(3)  |
| Gd2  | O3   | 2.531(6) | O4   | Gd2  | O3   | 78.4(2)  |
| Gd2  | O4   | 2.190(7) | O4   | Gd2  | O11  | 82.7(3)  |
| Gd2  | O5   | 2.341(5) |      |      |      |          |
| Gd2  | O11  | 2.411(3) |      |      |      |          |
| Gd2  | O12  | 2.440(7) |      |      |      |          |
| Gd2  | O13  | 2.468(7) |      |      |      |          |

Gd1 Gd2 3.8312(11)

**Table S3** Selected Bond distances and bond angles for **3**

| Atom | Atom | Length/Å   | Atom | Atom | Atom | Angle/°  |
|------|------|------------|------|------|------|----------|
| Tb1  | N1   | 2.443(9)   | N1   | Tb1  | O8   | 77.5(3)  |
| Tb1  | O1   | 2.204(8)   | O1   | Tb1  | N1   | 73.2(3)  |
| Tb1  | O2   | 2.319(6)   | O7   | Tb1  | N1   | 95.1(4)  |
| Tb1  | O5   | 2.348(6)   | Tb1  | O2   | Tb2  | 110.3(3) |
| Tb1  | O6   | 2.517(8)   | Tb2  | O5   | Tb1  | 109.7(3) |
| Tb1  | O7   | 2.435(10)  | O5   | Tb2  | N2   | 78.5(2)  |
| Tb1  | O8   | 2.448(8)   | O12  | Tb2  | N2   | 108.0(3) |
| Tb1  | O9   | 2.486(8)   | O5   | Tb2  | N2   | 78.5(2)  |
| Tb2  | O2   | 2.332(7)   | O1   | Tb1  | O6   | 121.8(2) |
| Tb2  | N2   | 2.432(9)   | O1   | Tb1  | O7   | 164.3(3) |
| Tb2  | O3   | 2.518(7)   | O4   | Tb2  | O3   | 78.4(2)  |
| Tb2  | O4   | 2.184(7)   | O4   | Tb2  | O1   | 82.7(3)  |
| Tb2  | O5   | 2.320(6)   |      |      |      |          |
| Tb2  | O11  | 2.399(9)   |      |      |      |          |
| Tb2  | O12  | 2.428(8)   |      |      |      |          |
| Tb2  | O13  | 2.467(8)   |      |      |      |          |
| Tb1  | Tb2  | 3.8157(11) |      |      |      |          |

**Table S4** Selected Bond distances and bond angles for **4**

| Atom | Atom | Length/Å | Atom | Atom | Atom | Angle/°  |
|------|------|----------|------|------|------|----------|
| Dy1  | O1   | 2.186(6) | N1   | Dy1  | O7   | 98.8(3)  |
| Dy1  | O2   | 2.314(5) | N1   | Dy1  | O8   | 77.3(2)  |
| Dy1  | O8   | 2.429(7) | O1   | Dy1  | N1   | 73.5(2)  |
| Dy1  | O9   | 2.492(7) | O4   | Dy2  | N2   | 72.6(2)  |
| Dy2  | O2   | 2.330(5) | O5   | Dy2  | N2   | 78.2(2)  |
| Dy2  | N2   | 2.448(7) | O12  | Dy2  | N2   | 108.3(3) |
| Dy2  | O3   | 2.523(6) | Dy2  | O5   | Dy1  | 109.5(2) |
| Dy2  | O4   | 2.171(5) | Dy1  | O2   | Dy2  | 109.9(2) |
| Dy2  | O5   | 2.317(5) | O1   | Dy1  | O6   | 78.8(2)  |
| Dy2  | O11  | 2.387(2) | O1   | Dy1  | O7   | 86.2(3)  |
| Dy2  | O12  | 2.424(7) | O4   | Dy2  | O3   | 77.5(2)  |
| Dy2  | O13  | 2.430(7) | O4   | Dy2  | O11  | 83.3(3)  |
| Dy1  | O6   | 2.513(7) |      |      |      |          |
| Dy1  | O7   | 2.447(3) |      |      |      |          |
| Dy1  | O5   | 2.339(6) |      |      |      |          |

|     |     |            |
|-----|-----|------------|
| Dy1 | N1  | 2.416(7)   |
| Dy1 | Dy2 | 3.8024(11) |

**Table S5** Selected Bond distances and bond angles for **5**

| Atom | Atom | Length/Å   | Atom | Atom | Atom | Angle/°  |
|------|------|------------|------|------|------|----------|
| Ho1  | N1   | 2.413(7)   | N1   | Ho1  | O7   | 98.8(3)  |
| Ho1  | O1   | 2.157(6)   | N1   | Ho1  | O8   | 76.7(2)  |
| Ho1  | O2   | 2.285(5)   | O1   | Ho1  | N1   | 74.1(2)  |
| Ho1  | O5   | 2.316(5)   | O5   | Ho2  | N2   | 78.3(2)  |
| Ho1  | O6   | 2.488(7)   | O4   | Ho2  | N2   | 72.2(2)  |
| Ho1  | O7   | 2.451(3)   | O12  | Ho2  | N2   | 108.5(3) |
| Ho1  | O8   | 2.414(7)   | Ho1  | O2   | Ho2  | 109.6(2) |
| Ho1  | O9   | 2.455(7)   | Ho2  | O5   | Ho1  | 109.2(2) |
| Ho2  | O2   | 2.310(5)   | O1   | Ho1  | O6   | 78.5(2)  |
| Ho2  | N2   | 2.439(7)   | O1   | Ho1  | O7   | 87.3(3)  |
| Ho2  | O3   | 2.501(6)   | O4   | Ho2  | O3   | 77.5(2)  |
| Ho2  | O4   | 2.159(6)   | O4   | Ho2  | O11  | 83.3(3)  |
| Ho2  | O5   | 2.291(5)   |      |      |      |          |
| Ho2  | O11  | 2.394(2)   |      |      |      |          |
| Ho2  | O12  | 2.410(7)   |      |      |      |          |
| Ho2  | O13  | 2.438(7)   |      |      |      |          |
| Ho1  | Ho2  | 3.7554(10) |      |      |      |          |

**Table S6** Selected Bond distances and bond angles for **6**

| Atom | Atom | Length/Å  | Atom | Atom | Atom | Angle/°  |
|------|------|-----------|------|------|------|----------|
| Er1  | N1   | 2.386(9)  | N1   | Er1  | O7   | 97.5(4)  |
| Er1  | O1   | 2.161(9)  | N1   | Er1  | O8   | 77.3(3)  |
| Er1  | O5   | 2.314(8)  | O1   | Er1  | N1   | 74.6(3)  |
| Er1  | O6   | 2.489(8)  | O4   | Er2  | N2   | 72.4(3)  |
| Er1  | O7   | 2.463(4)  | O5   | Er2  | N2   | 78.4(3)  |
| Er1  | O8   | 2.419(8)  | Er1  | O2   | Er2  | 110.1(3) |
| Er1  | O9   | 2.432(8)  | O12  | Er2  | N2   | 107.6(3) |
| Er2  | O2   | 2.297(7)  | Er2  | O5   | Er1  | 109.4(3) |
| Er2  | N2   | 2.429(10) | O1   | Er1  | O6   | 78.0(3)  |
| Er2  | O3   | 2.504(7)  | O1   | Er1  | O7   | 85.1(4)  |
| Er2  | O4   | 2.156(8)  | O4   | Er2  | O3   | 77.3(3)  |
| Er2  | O5   | 2.292(7)  | O4   | Er2  | O11  | 84.3(3)  |
| Er2  | O11  | 2.384(3)  |      |      |      |          |
| Er2  | O12  | 2.386(9)  |      |      |      |          |

|     |     |            |
|-----|-----|------------|
| Er2 | O13 | 2.449(8)   |
| Er1 | O2  | 2.289(7)   |
| Er1 | Er2 | 3.7596(11) |

---

**Table S7** Selected Bond distances and bond angles for **7**

| Atom | Atom | Length/Å   | Atom | Atom | Atom | Angle/°    |
|------|------|------------|------|------|------|------------|
| Yb1  | O1   | 2.141(4)   | O1   | Yb1  | N1   | 74.71(16)  |
| Yb1  | O2   | 2.276(4)   | N1   | Yb1  | O8   | 76.92(16)  |
| Yb1  | O5   | 2.284(4)   | N1   | Yb1  | O7   | 97.5(2)    |
| Yb1  | N1   | 2.383(5)   | O5   | Yb2  | N2   | 78.86(15)  |
| Yb1  | O8   | 2.399(5)   | O4   | Yb2  | N2   | 73.23(16)  |
| Yb1  | O7   | 2.467(2)   | O12  | Yb2  | N2   | 106.89(19) |
| Yb1  | O9   | 2.433(5)   | Yb2  | O2   | Yb1  | 110.03(15) |
| Yb1  | O6   | 2.481(5)   | Yb2  | O5   | Yb1  | 109.89(15) |
| Yb2  | O4   | 2.126(4)   | O1   | Yb1  | O6   | 77.28(17)  |
| Yb2  | O2   | 2.280(4)   | O1   | Yb1  | O7   | 85.7(2)    |
| Yb2  | O5   | 2.276(4)   | O4   | Yb2  | O3   | 76.07(15)  |
| Yb2  | O11  | 2.3801(17) | O4   | Yb2  | O11  | 83.81(18)  |
| Yb2  | O12  | 2.378(5)   |      |      |      |            |
| Yb2  | N2   | 2.408(5)   |      |      |      |            |
| Yb2  | O13  | 2.432(5)   |      |      |      |            |
| Yb2  | O3   | 2.488(4)   |      |      |      |            |
| Yb1  | Yb2  | 3.7332(8)  |      |      |      |            |

---

### 3. XRD patterns of 1-7

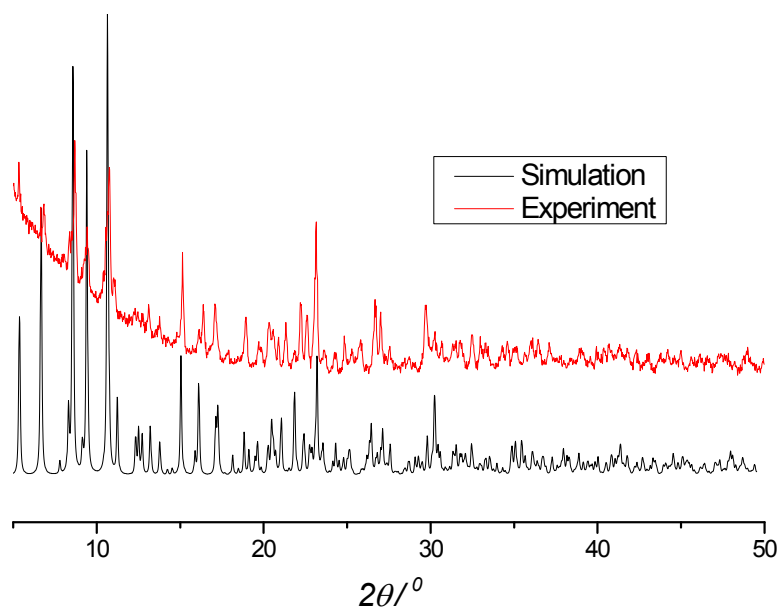

**Fig. S3** PXRD patterns for 1.

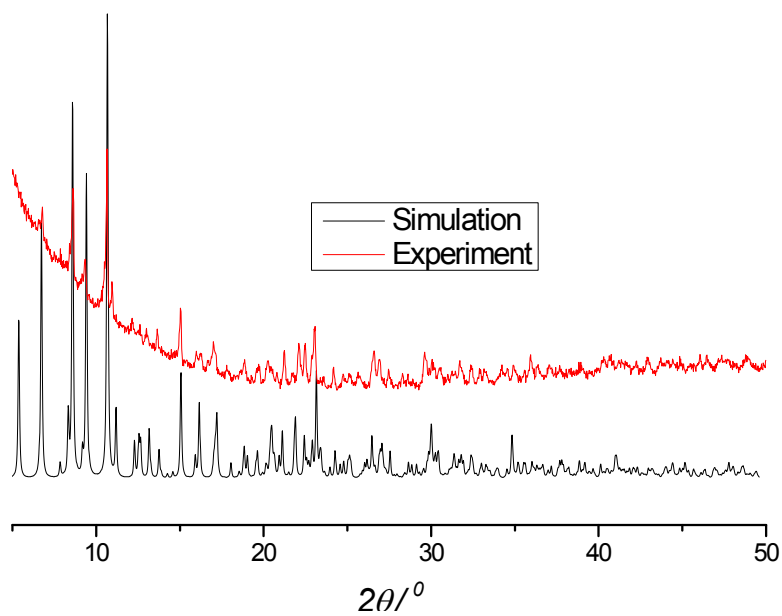

**Fig. S4** PXRD patterns for 2.



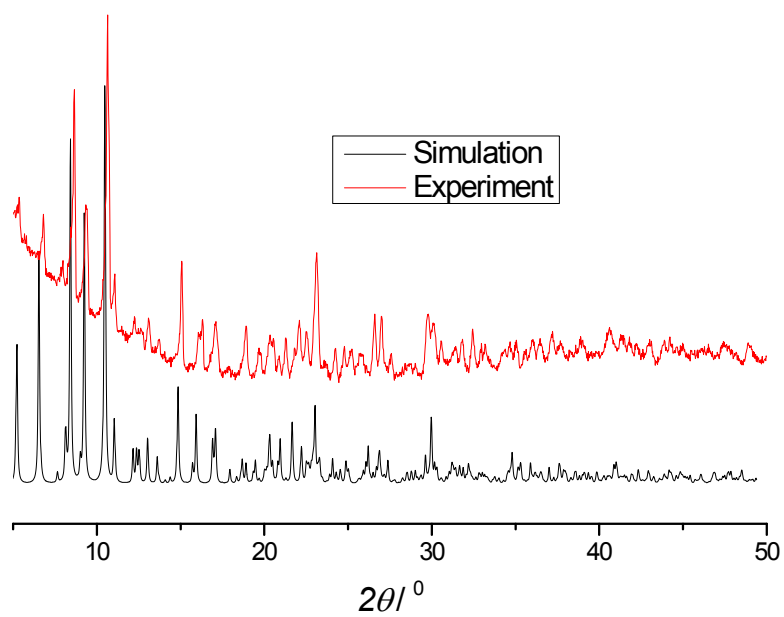

**Fig. S5** PXRD patterns for **3**.

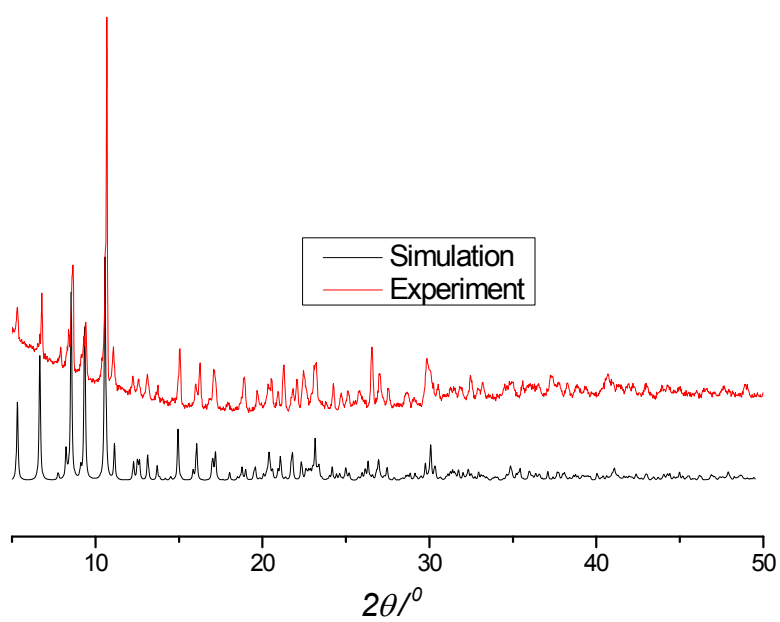

**Fig. S6** PXRD patterns for **4**.

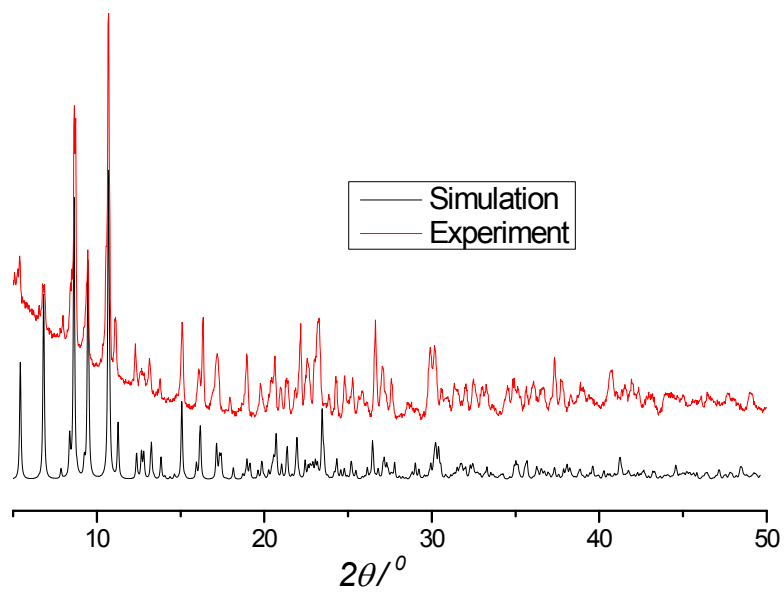

**Fig. S7** PXR D patterns for **5**.

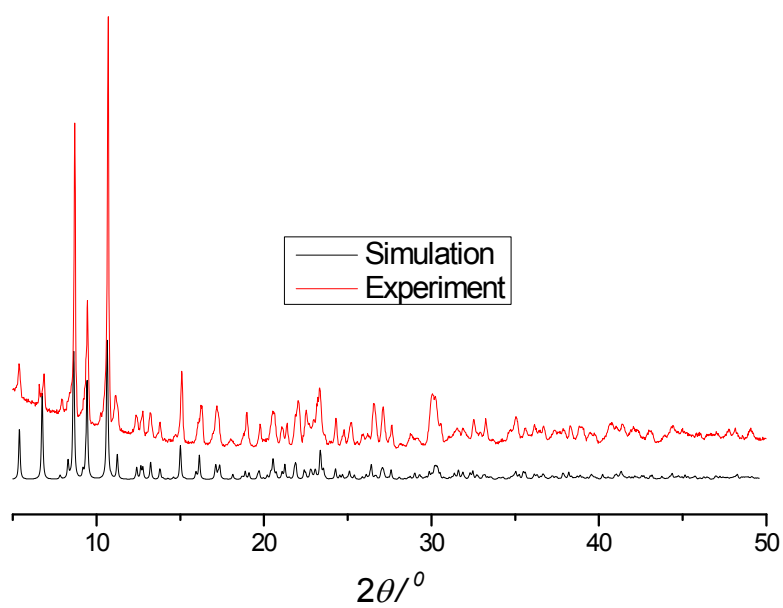

**Fig. S8** PXR D patterns for **6**.

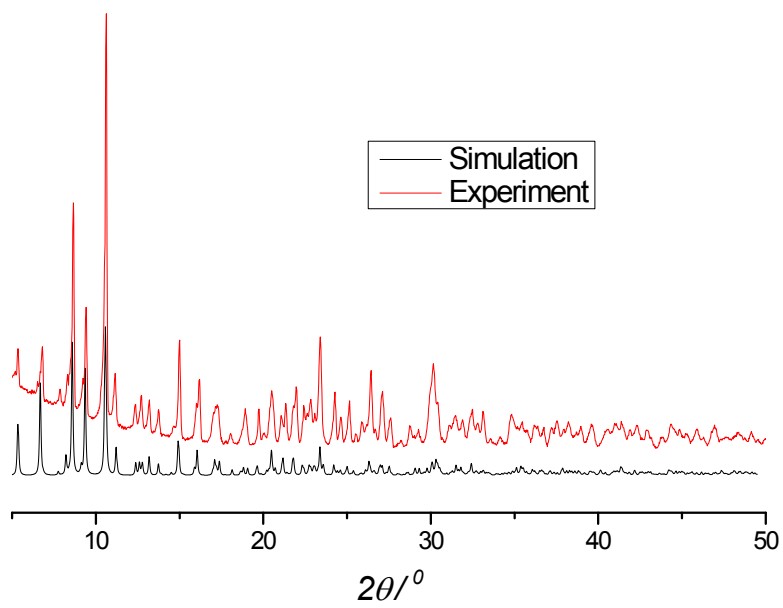

**Fig. S9** PXR D patterns for 7.

4. IR spectra of the H<sub>2</sub>L ligand and **1-7**

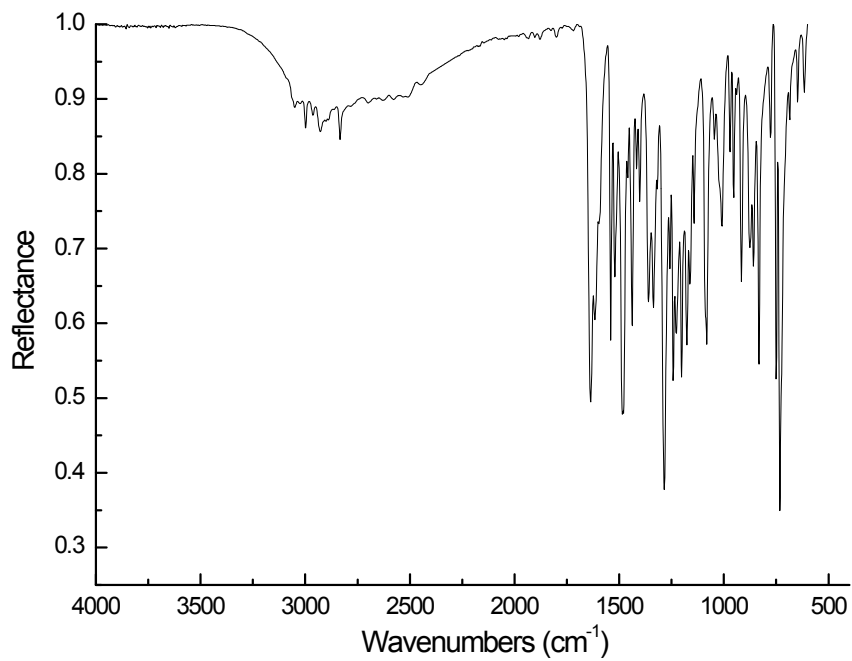

**Fig. S10** The IR spectrum of H<sub>2</sub>L.

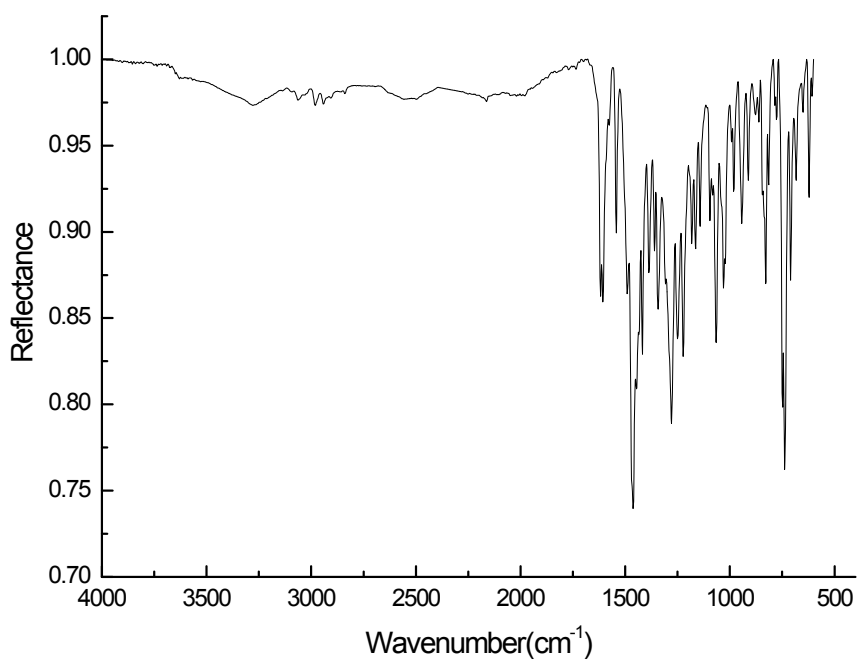

**Fig. S11** The IR spectrum of **1**.

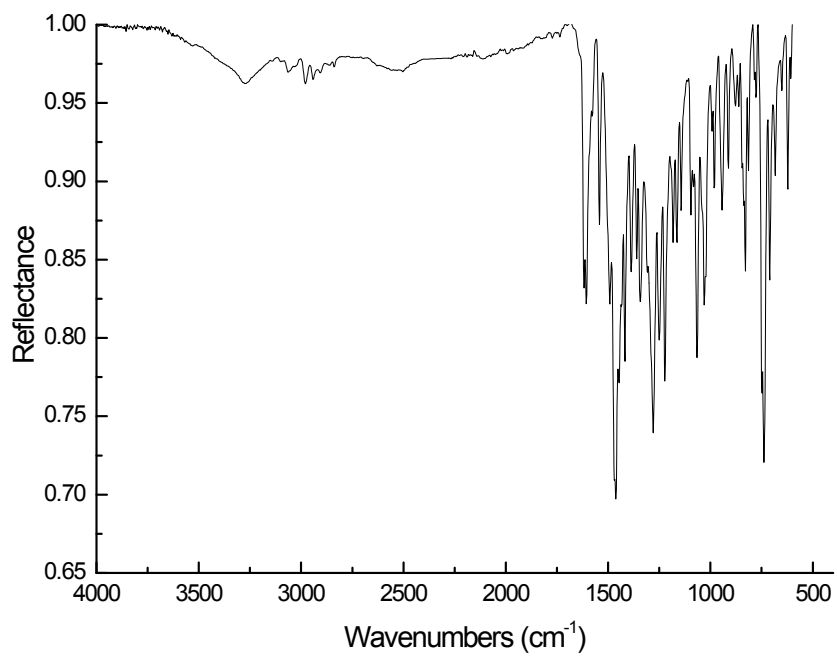

**Fig. S12** The IR spectrum of **2**.

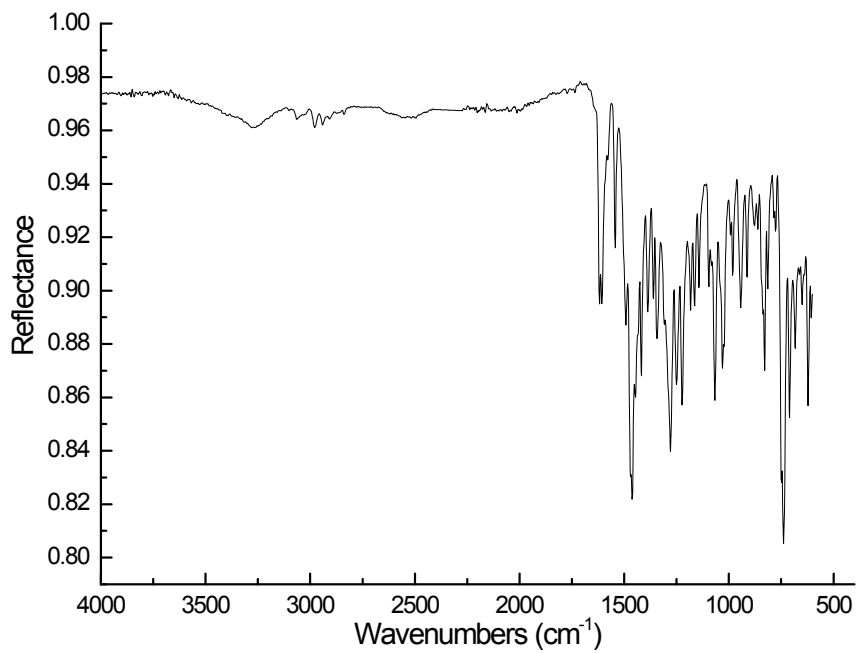

**Fig. S13** The IR spectrum of **3**.

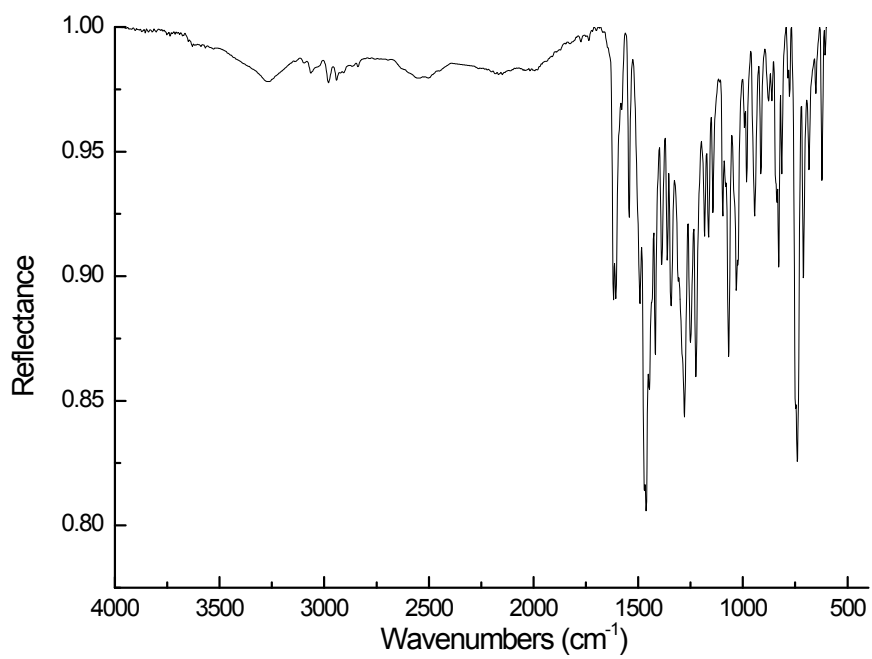

**Fig. S14** The IR spectrum of **4**.

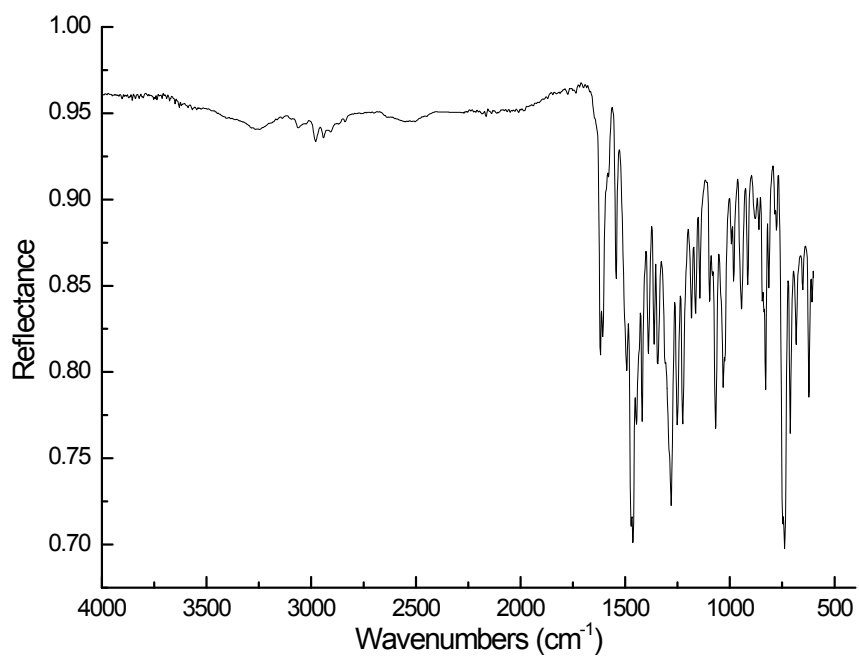

**Fig. S15** The IR spectrum of **5**.

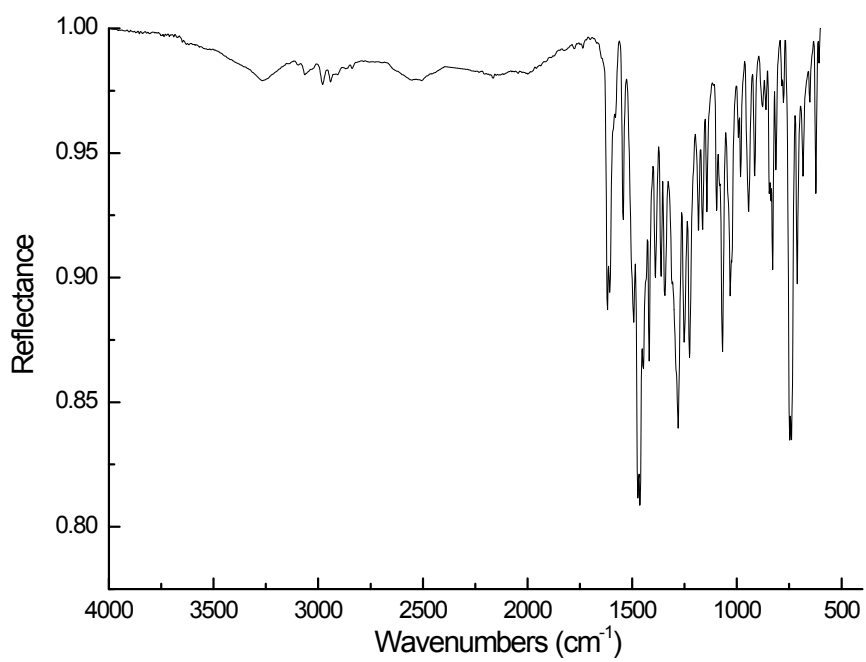

**Fig. S16** The IR spectrum of **6**.

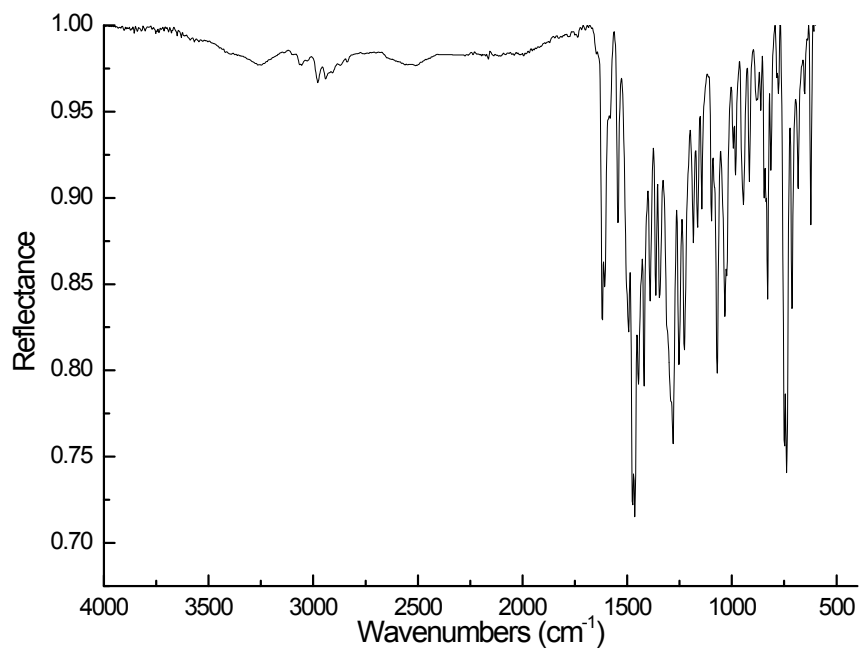

**Fig. S17** The IR spectrum of **7**.

5. Dc magnetic properties of **2**, **3**, **4** and **6**

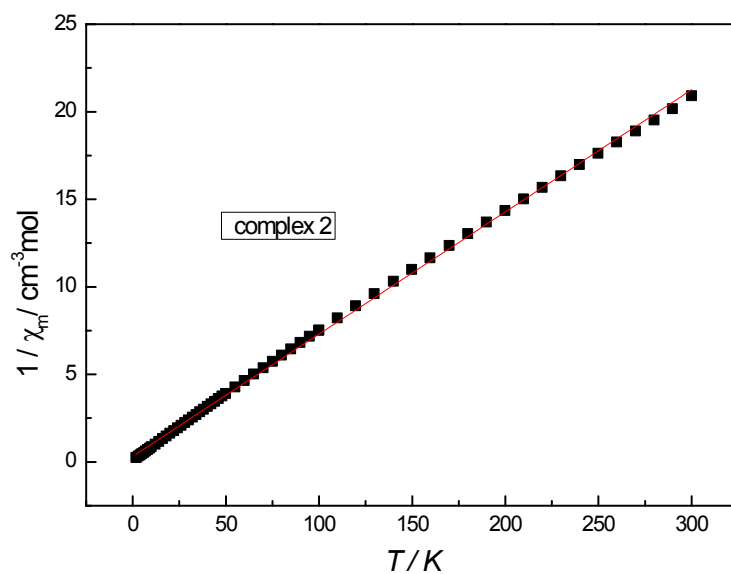

**Fig. S18** The plot of  $1/\chi_M$  versus  $T$  for **2** and the linear fit of Curie-Weiss law at 1000 Oe field.

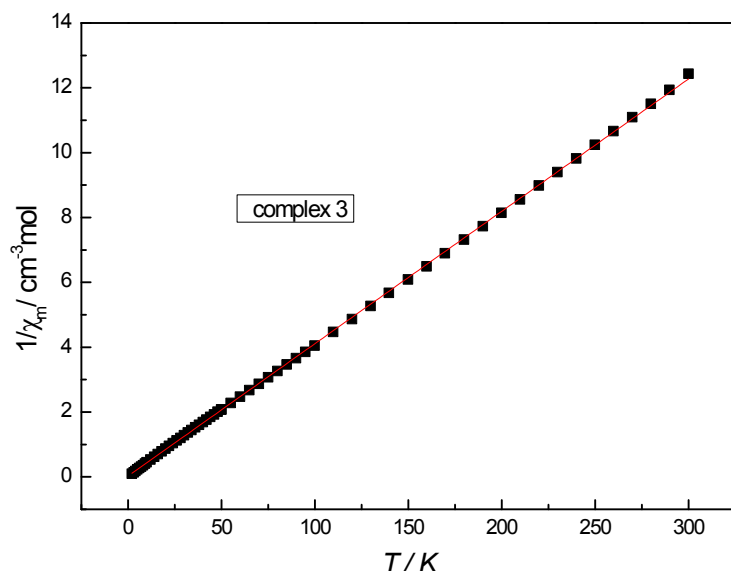

**Fig. S19** The plot of  $1/\chi_M$  versus  $T$  for **3** and the linear fit of Curie-Weiss law at 1000 Oe field.



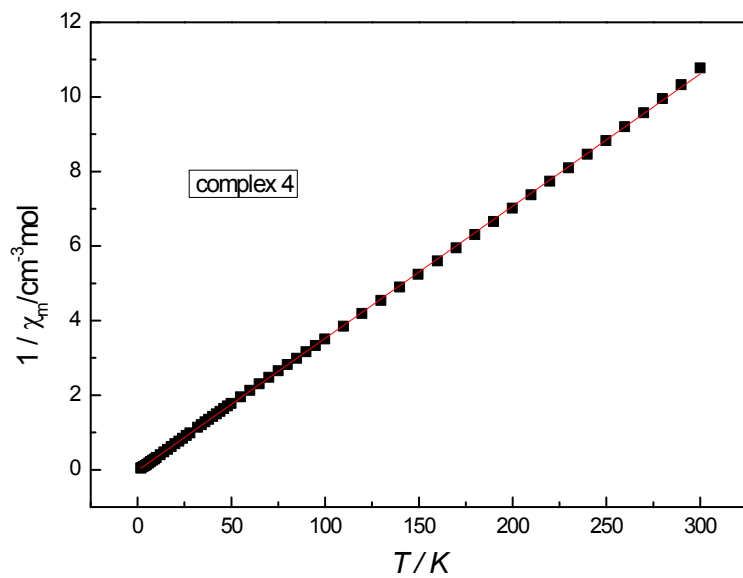

**Fig. S20** The plot of  $1/\chi_m$  versus  $T$  for **4** and the linear fit of Curie-Weiss law at 1000 Oe field.

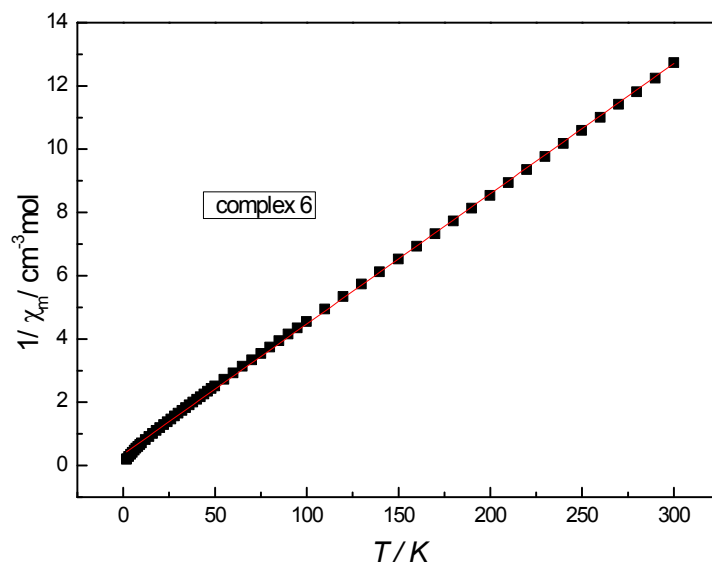

**Fig. S21** The plot of  $1/\chi_m$  versus  $T$  for **6** and the linear fit of Curie-Weiss law at 1000 Oe field.

## 6. Parameters obtained from fitting the Cole-Cole plots of 4

**Table S8** Parameters from the least-square fitting of the Cole-Cole plots of 4 according to the generalized Debye model.

| Temperature / K | $X_s / \text{cm}^3 \text{mol}^{-1} \text{K}$ | $X_T / \text{cm}^3 \text{mol}^{-1} \text{K}$ | $\tau / \text{s}$ | $\alpha$ |
|-----------------|----------------------------------------------|----------------------------------------------|-------------------|----------|
| 2               | 6.72E-02                                     | 2.04E+01                                     | 1.95E-01          | 1.91E-01 |
| 2.5             | 6.03E-02                                     | 1.41E+01                                     | 1.24E-01          | 1.75E-01 |
| 3               | 5.39E-02                                     | 1.10E+01                                     | 9.39E-02          | 1.69E-01 |
| 3.5             | 4.85E-02                                     | 8.92E+00                                     | 7.32E-02          | 1.66E-01 |
| 4               | 4.24E-02                                     | 7.75E+00                                     | 6.01E-02          | 1.69E-01 |
| 4.5             | 3.54E-02                                     | 6.94E+00                                     | 4.91E-02          | 1.75E-01 |
| 5               | 2.60E-02                                     | 6.43E+00                                     | 4.01E-02          | 1.86E-01 |
| 5.5             | 1.49E-02                                     | 6.18E+00                                     | 3.34E-02          | 2.03E-01 |
| 6               | 2.90E-03                                     | 5.87E+00                                     | 2.67E-02          | 2.18E-01 |
| 6.5             | 9.70E-16                                     | 5.54E+00                                     | 2.04E-02          | 2.28E-01 |
| 7               | 1.59E-15                                     | 5.17E+00                                     | 1.52E-02          | 2.33E-01 |
| 8               | 1.79E-15                                     | 4.37E+00                                     | 7.78E-03          | 2.30E-01 |
| 9               | 4.22E-15                                     | 3.73E+00                                     | 4.19E-03          | 2.23E-01 |
| 10              | 7.82E-15                                     | 3.25E+00                                     | 2.42E-03          | 2.17E-01 |
| 11              | 1.29E-14                                     | 2.89E+00                                     | 1.48E-03          | 2.12E-01 |
| 12              | 2.05E-14                                     | 2.60E+00                                     | 9.57E-04          | 2.04E-01 |
| 13              | 4.54E-14                                     | 2.36E+00                                     | 6.43E-04          | 1.96E-01 |
| 14              | 7.33E-14                                     | 2.16E+00                                     | 4.48E-04          | 1.86E-01 |
| 15              | 1.13E-13                                     | 1.99E+00                                     | 3.22E-04          | 1.76E-01 |
| 16              | 2.38E-13                                     | 1.85E+00                                     | 2.39E-04          | 1.65E-01 |

7. Plot of  $\ln \tau$  versus  $T^{-1}$  of 4 considering the Raman and Orbach processes

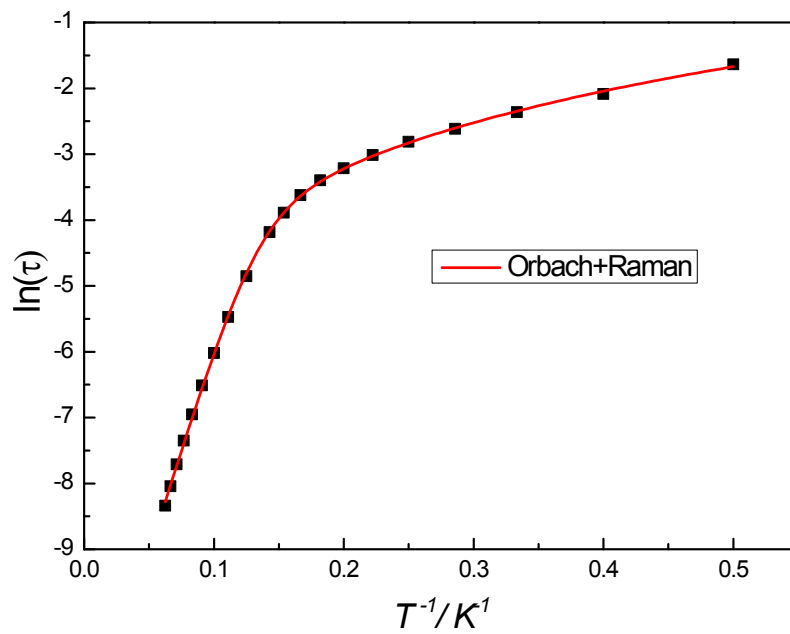

**Fig. S22** The plot of  $\ln \tau$  versus  $T^{-1}$  of 4. The red solid line represents the fitting by the Arrhenius law considering the Raman and Orbach processes;  $C = 1.67$ ,  $n = 1.66$ ,  $U_{\text{eff}} = 67$  K and  $\tau_0 = 4.8 \times 10^{-6}$  s.

## 8. Ac magnetic properties of 4

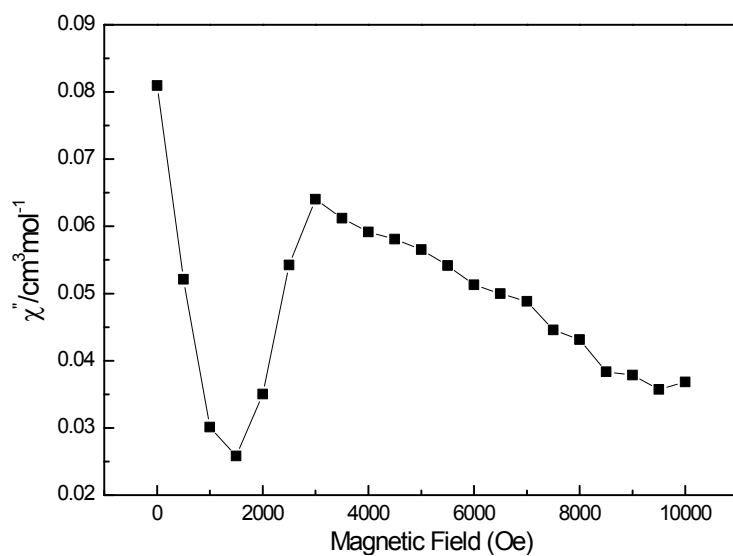

**Fig. S23** The out-of-phase ( $\chi''$ ) ac susceptibility for 4 (2 K,  $f = 999$  Hz) under the applied static field from 0-10000 Oe.

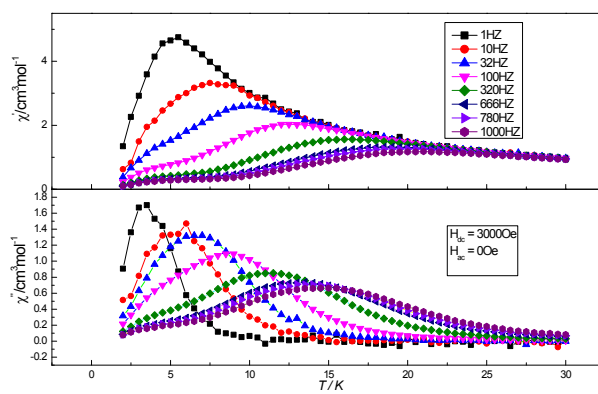

**Fig. S24** Temperature dependence of the in-phase and out-of-phase ac susceptibility data for 4 under 3000 Oe dc field range from 2 to 30 K.

## 9. Ac Magnetic properties of **5**

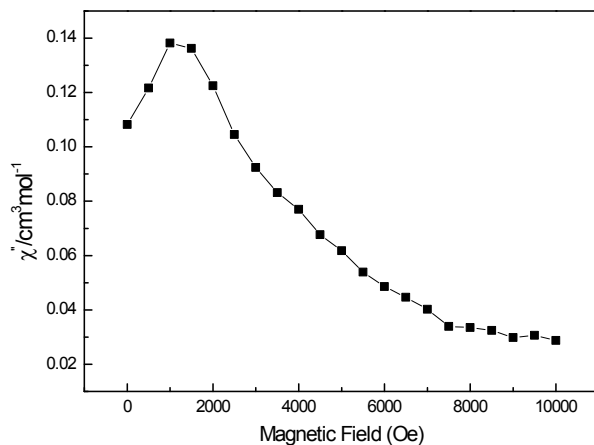

**Fig. S25** The out-of-phase ( $\chi''$ ) ac susceptibility for **5** ( $2 \text{ K}$ ,  $f = 999 \text{ Hz}$ ) under the applied static field from 0-10000 Oe.

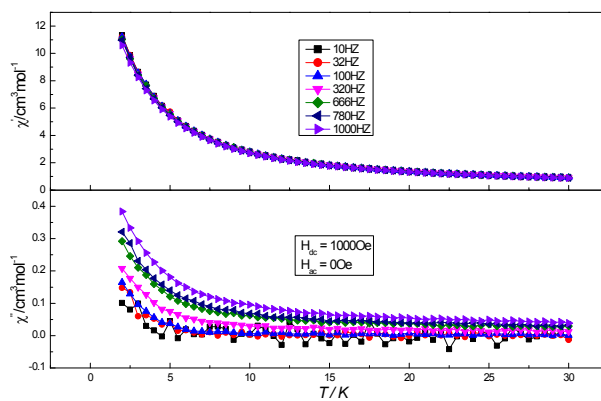

**Fig. S26** Temperature dependence of the in-phase and out-of-phase ac susceptibility data for **5** under 1000 Oe dc field range from 2 to 30 K.

## 10. Dy<sub>2</sub> SMMs reported in the literature

**Table S9** Examples of O-bridged dinuclear dysprosium complexes having SMM properties

| Complexes                                                                                                      | Ligand                                                                                                                                                                     | Coordination Numbers and configurations | Dy...Dy distance (Å) | Dy–O–Dy bond angle (°) | Magnetic properties U <sub>eff</sub> (K), τ <sub>0</sub> (s)                                                                                                  | Ref.  |
|----------------------------------------------------------------------------------------------------------------|----------------------------------------------------------------------------------------------------------------------------------------------------------------------------|-----------------------------------------|----------------------|------------------------|---------------------------------------------------------------------------------------------------------------------------------------------------------------|-------|
| [Dy <sub>2</sub> (a'povh) <sub>2</sub> (OAc) <sub>2</sub> (DMF) <sub>2</sub> ]                                 | 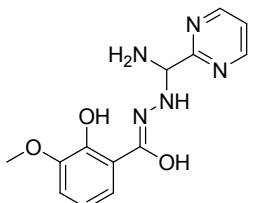                                                                                          | 8, a hula-hoop-like geometry            | 3.6768(5)            | 102.62(13)             | U <sub>eff</sub> = 322.1<br>τ <sub>0</sub> = 3.4 × 10 <sup>-9</sup><br>antiferromagnetic                                                                      | 1 (a) |
| [Dy <sub>2</sub> (HL) <sub>2</sub> Cl <sub>2</sub> (H <sub>2</sub> O) <sub>3</sub> · 2H <sub>2</sub> O · MeCN] |                                                                                           | 8, distorted pentagonal-bipyramidal     | 3.9557(8)            | 114.6(3)               | U <sub>eff1</sub> = 204<br>τ <sub>01</sub> = 5.93 × 10 <sup>-9</sup><br>U <sub>eff2</sub> = 103<br>τ <sub>02</sub> = 1.76 × 10 <sup>-8</sup><br>ferromagnetic | 1 (b) |
| [Dy <sub>2</sub> (ovph) <sub>2</sub> Cl <sub>2</sub> (MeOH) <sub>3</sub> · MeCN]                               |                                                                                         | 8, pentagonal bipyramidal               | 3.8644 (5)           | 111.5(2) -<br>112.3(2) | U <sub>eff1</sub> = 150<br>τ <sub>01</sub> = 2.3 × 10 <sup>-8</sup><br>U <sub>eff2</sub> = 198<br>τ <sub>02</sub> = 7.3 × 10 <sup>-9</sup><br>ferromagnetic   | 1 (c) |
| [Dy <sub>2</sub> (dbm) <sub>4</sub> (OQ) <sub>2</sub> (CH <sub>3</sub> OH) <sub>2</sub> ]                      | <br> | 8, triangular square antiprism          | 3.908(2)             | 111.45(10)             | U <sub>eff</sub> = 109.5<br>τ <sub>0</sub> = 4.23 × 10 <sup>-9</sup><br>ferromagnetic                                                                         | 1 (d) |
| [Dy <sub>2</sub> (Mq) <sub>4</sub> (NO <sub>3</sub> ) <sub>6</sub> ]                                           |                                                                                         | 9, distorted trigonal prism             | 3.914(5)             | 112.26(1)              | U <sub>eff</sub> = 40.01<br>τ <sub>0</sub> = 5.44 × 10 <sup>-6</sup><br>antiferromagnetic                                                                     | 1 (e) |
| [Dy <sub>2</sub> (Mq) <sub>4</sub> Cl <sub>6</sub> (EtOH) <sub>2</sub> ]                                       |                                                                                         | 6, distorted octahedral                 | 3.836(8)             | 110.80(1)              | U <sub>eff</sub> = 102.4<br>τ <sub>0</sub> = 3.54 × 10 <sup>-5</sup><br>antiferromagnetic                                                                     | 1 (e) |
| [Dy <sub>2</sub> (hfac) <sub>4</sub> (L) <sub>2</sub> ]                                                        |                                                                                                                                                                            | 8, distorted dodecahedral               | 3.7633(8)            | 107.572(90)            | U <sub>eff</sub> = 6.77<br>τ <sub>0</sub> = 9.12 × 10 <sup>-6</sup>                                                                                           | 1 (f) |

|                                                                                                       |                                                                                     |                                                   |            |            |                                                                          |                            |
|-------------------------------------------------------------------------------------------------------|-------------------------------------------------------------------------------------|---------------------------------------------------|------------|------------|--------------------------------------------------------------------------|----------------------------|
|                                                                                                       | 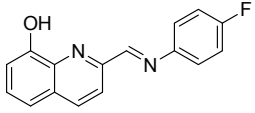   |                                                   |            |            |                                                                          | antiferromagnetic          |
|                                                                                                       |    |                                                   |            |            |                                                                          |                            |
| [Dy <sub>2</sub> (tfac) <sub>4</sub> L <sub>2</sub> ]                                                 |    | 8, distorted<br>dodecahedral                      | 3.8800(10) | 110.1(3)   | U <sub>eff</sub> = 19.83<br>τ <sub>0</sub> = 7.62 × 10 <sup>-8</sup>     | 1 (f)<br>antiferromagnetic |
|                                                                                                       |    |                                                   |            |            |                                                                          |                            |
| [Dy <sub>2</sub> (bfac) <sub>4</sub> (L) <sub>2</sub> ]<br>·C <sub>7</sub> H <sub>16</sub>            |    | 8, distorted<br>dodecahedral                      | 3.8326(10) | 108.88(10) | U <sub>eff</sub> = 25.65<br>τ <sub>0</sub> = 1.64 × 10 <sup>-6</sup>     | 1 (f)<br>antiferromagnetic |
|                                                                                                       |   |                                                   |            |            |                                                                          |                            |
| [Dy <sub>2</sub> (hmi) <sub>2</sub> (NO <sub>3</sub> ) <sub>2</sub> ]<br>(MeOH) <sub>2</sub> ]        |  | 8, distorted<br>dodecahedral                      | ---        | 106.41     | U <sub>eff</sub> = 56<br>τ <sub>0</sub> = 3 × 10 <sup>-7</sup>           | 1 (g)<br>ferromagnetic     |
|                                                                                                       |  |                                                   |            |            |                                                                          |                            |
| [Dy <sub>2</sub> (hmi) <sub>2</sub> (NO <sub>3</sub> ) <sub>2</sub> ]<br>(MeOH) <sub>2</sub> ] · MeCN |  | 8, distorted<br>dodecahedral                      | ---        | 107.68     | U <sub>eff</sub> = 71<br>τ <sub>0</sub> = 7 × 10 <sup>-8</sup>           | 1 (g)<br>ferromagnetic     |
|                                                                                                       |  |                                                   |            |            |                                                                          |                            |
| [Dy <sub>2</sub> (valdien) <sub>2</sub> ]<br>(NO <sub>3</sub> ) <sub>2</sub> ]                        |  | 8, distorted<br>dodecahedral                      | 3.768(3)   | 108.22(3)  | U <sub>eff</sub> = 76<br>τ <sub>0</sub> = 6.04 × 10 <sup>-7</sup>        | 1 (h)<br>antiferromagnetic |
|                                                                                                       |  |                                                   |            |            |                                                                          |                            |
| [Dy <sub>2</sub> (μ <sub>2</sub> -anthc) <sub>4</sub><br>(anthc) <sub>2</sub> (L) <sub>2</sub> ] (1)  |  | 9, distorted<br>monocapped<br>square<br>antiprism | 3.9490(2)  | 105.18(6)  | U <sub>eff</sub> = 51.2(3)<br>τ <sub>0</sub> = 3.2(1) × 10 <sup>-8</sup> | 1 (i)<br>ferromagnetic     |
|                                                                                                       |  |                                                   |            |            |                                                                          |                            |

|                                                                                                                    |                                                                                    |                                                   |           |            |                                                                                                                                          |                            |
|--------------------------------------------------------------------------------------------------------------------|------------------------------------------------------------------------------------|---------------------------------------------------|-----------|------------|------------------------------------------------------------------------------------------------------------------------------------------|----------------------------|
| [Dy <sub>2</sub> (μ <sub>2</sub> -anthc) <sub>4</sub><br>(anthc) <sub>2</sub> (L <sub>2</sub> ) <sub>2</sub> ] (2) | 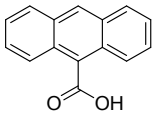  | 9, distorted<br>monocapped<br>square<br>antiprism | 3.9176(4) | 106.20(10) | U <sub>eff</sub> = 49.4<br>τ <sub>0</sub> = 4.6(2) × 10 <sup>-8</sup>                                                                    | 1 (i)<br>ferromagnetic     |
| [Dy <sub>2</sub> (μ <sub>2</sub> -anthc) <sub>4</sub><br>(anthc) <sub>2</sub> (L <sub>2</sub> ) <sub>2</sub> ] (3) |   | 9, distorted<br>monocapped<br>square<br>antiprism | 3.9224(6) | 105.18(6)  | U <sub>eff</sub> = 31.6<br>τ <sub>0</sub> = 3.4(2) × 10 <sup>-8</sup>                                                                    | 1 (i)<br>ferromagnetic     |
| [Dy <sub>2</sub> (HL1) <sub>2</sub> (NO <sub>3</sub> ) <sub>4</sub> ]                                              |   | 9, distorted<br>monocapped<br>square antiprism    | 3.709     | 109.83     | U <sub>eff</sub> = 72.48<br>τ <sub>0</sub> = 8.504 × 10 <sup>-8</sup>                                                                    | 1 (j)<br>antiferromagnetic |
| [Dy <sub>2</sub> (L2) <sub>2</sub> (NO <sub>3</sub> ) <sub>4</sub> ]                                               |   | 9, distorted<br>monocapped<br>square antiprism    | 3.706     | 109.71     | U <sub>eff</sub> = 41.55<br>τ <sub>0</sub> = 8.5 × 10 <sup>-7</sup>                                                                      | 1 (j)<br>antiferromagnetic |
| [Dy <sub>2</sub> (HL3) <sub>2</sub> (NO <sub>3</sub> ) <sub>4</sub> ]                                              |   | 9, distorted<br>monocapped<br>square antiprism    | 3.719     | 110.65     | U <sub>eff</sub> = 6.77<br>τ <sub>0</sub> = 9.12 × 10 <sup>-6</sup>                                                                      | 1 (j)<br>ferromagnetic     |
| [Dy <sub>2</sub> (H <sub>3</sub> L) <sub>2</sub><br>(PhCOO) <sub>4</sub> ]·4H <sub>2</sub> O                       |   | 9, tricapped<br>trigonal prism                    | 3.695     | 101.78     | U <sub>eff</sub> = 42.7<br>τ <sub>0</sub> = 1.37 × 10 <sup>-7</sup>                                                                      | 1 (k)<br>antiferromagnetic |
| [Dy <sub>2</sub> (L) <sub>2</sub> (acac) <sub>2</sub><br>(H <sub>2</sub> O)]·2CH <sub>2</sub> Cl <sub>2</sub>      |  | 9, distorted square<br>antiprism                  | 3.84      | 110.8      | U <sub>eff1</sub> = 37<br>τ <sub>01</sub> = 4.2 × 10 <sup>-7</sup><br>U <sub>eff2</sub> = 80<br>τ <sub>02</sub> = 8.3 × 10 <sup>-8</sup> | 1 (l)<br>ferromagnetic     |



|                                                                                                                                                                       |                                                                                   |                                                |            |                        |                                                                                                                                                                                 |              |
|-----------------------------------------------------------------------------------------------------------------------------------------------------------------------|-----------------------------------------------------------------------------------|------------------------------------------------|------------|------------------------|---------------------------------------------------------------------------------------------------------------------------------------------------------------------------------|--------------|
| [Dy <sub>2</sub> (H <sub>2</sub> L) <sub>2</sub> (μ-piv) <sub>2</sub><br>(piv) <sub>2</sub> ] <sub>2</sub> CHCl <sub>3</sub>                                          | 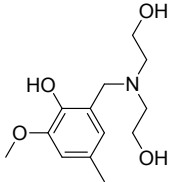 | 9, distorted<br>monocapped<br>square-antiprism | 3.633      | 103.02                 | U <sub>eff1</sub> = 8.96<br>τ <sub>01</sub> = 8.81 ×<br>10 <sup>-5</sup><br>U <sub>eff2</sub> = 35.51<br>τ <sub>02</sub> = 1.48 ×<br>10 <sup>-6</sup><br>antiferromag-<br>netic | 1(m)         |
| [Dy <sub>2</sub> L <sub>2</sub> (C <sub>2</sub> H <sub>5</sub> OH) <sub>2</sub><br>(NO <sub>3</sub> ) <sub>2</sub> ] <sub>2</sub> ·0.5C <sub>3</sub> H <sub>5</sub> N |  | 8, distorted<br>dodecahedral                   | 3.8024(11) | 109.5(2) -<br>109.9(2) | U <sub>eff</sub> = 66.7<br>τ <sub>0</sub> = 3.76 ×<br>10 <sup>-6</sup><br>ferromagnetic                                                                                         | This<br>work |

## References

- (a) S. Xue, Y. Guo, L. Ungur, J. Tang and L. F. Chibotaru, *Chem. Eur. J.*, 2015, **21**, 14099; (b) L. Zhang, J. Jung, P. Zhang, M. Guo, L. Zhao, J. Tang and B. Le Guennic, *Chem. Eur. J.*, 2016, **22**, 1392; (c) Y. Guo, G. Xu, W. Wernsdorfer, L. Ungur, Y. Guo, J. Tang, H. Zhang, L. F. Chibotaru and A. K. Powell, *J. Am. Chem. Soc.*, 2011, **133**, 1194; (d) H. Shen, W. Wang, H. Gao and J. Cui, *RSC Adv.*, 2016, **6**, 34165; (e) F. Yang, Q. Zhou, G. Zeng, G. Li, L. Gao, Z. Shi and S. Feng, *Dalton Trans.*, 2014, **43**, 1238; (f) W. Wang, H. Zhang, S. Wang, H. Shen, H. Gao, J. Cui and B. Zhao, *Inorg. Chem.*, 2015, **54**, 10610; (g) P. Lin, T. J. Burchell, R. Clérac and M. Murugesu, *Angew. Chem., Int. Ed.*, 2008, **47**, 8848; (h) J. Long, F. Habib, P.-H. Lin, I. Korobkov, G. Enright, L. Ungur, W. Wernsdorfer, L. F. Chibotaru and M. Murugesu, *J. Am. Chem. Soc.*, 2011, **133**, 5319; (i) Y. Wang, C. Han, Y. Zhang, Q. Liu, C. Liu and S. Yin, *Inorg. Chem.*, 2016, **55**, 5578; (j) Y. Peng, V. Mereacre, A. Baniodeh, Y. Lan, M. Schlageter, G. E. Kostakis and A. K. Powell, *Inorg. Chem.*, 2016, **55**, 68; (k) H. Ke, S. Zhang, X. Li, Q. Wei, G. Xie, W. Wang and S. Chen, *Dalton Trans.*, 2015, **44**, 21025; (l) P. Lin, W. Sun, M. Yu, G. Li, P. Yan and M. Murugesu, *Chem. Commun.*, 2011, **47**, 10993; (m) P. Bag, C. K. Rastogi, S. Biswas, S. Sivakumar, V. Mereacre and V. Chandrasekhar, *Dalton Trans.*, 2015, **44**, 4328.
